# Supplementary material
Source: PubMed Central journal article supplement (PMC4657830)
Supplement: ASN.2014080764_ASN2014080764SupplementaryData.pdf [file ASN.2014080764_ASN2014080764SupplementaryData.pdf]

**SUPPLEMENTARY DATA**

**Supplementary Table 1a. Plasma IL-6 and IL-10 measurements by AKI status**

|                                   | IL-6 (pg/ml) |     |         |       |         |       |         |       | IL-10 (pg/ml) |     |        |       |         |      |         |     |
|-----------------------------------|--------------|-----|---------|-------|---------|-------|---------|-------|---------------|-----|--------|-------|---------|------|---------|-----|
|                                   | Pre-op       |     | Day 1   |       | Day 2   |       | Day 3   |       | Pre-op        |     | Day 1  |       | Day 2   |      | Day 3   |     |
|                                   | No AKI       | AKI | No AKI  | AKI   | No AKI  | AKI   | No AKI  | AKI   | No AKI        | AKI | No AKI | AKI   | No AKI  | AKI  | No AKI  | AKI |
| <b>25<sup>th</sup> percentile</b> | 0.6          | 1.9 | 85.1    | 121.2 | 91.0    | 107.6 | 75.1    | 88.8  | 0.9           | 0.9 | 12.2   | 18.9  | 0.9     | 2.9  | 0.9     | 0.9 |
| <b>Median</b>                     | 2.7          | 3.9 | 145.5   | 208.4 | 143.6   | 179.7 | 110.7   | 143.0 | 0.9           | 0.9 | 37.9   | 53.6  | 3.8     | 5.8  | 0.9     | 0.9 |
| <b>75<sup>th</sup> percentile</b> | 6.4          | 8.2 | 255.5   | 368.1 | 233.4   | 297.5 | 168.3   | 228.4 | 0.9           | 0.9 | 95.7   | 134.5 | 7.8     | 12.5 | 0.9     | 3.4 |
| <b>*P value</b>                   | 0.001        |     | <0.0001 |       | <0.0001 |       | <0.0001 |       | 0.5709        |     | 0.0005 |       | <0.0001 |      | <0.0001 |     |

**AKI defined as an increase in serum creatinine by >50% or > 0.3mg/dL**

Day 1 refers to postoperative time 0-6 hours after surgery, day 2 corresponds to 48 hours after surgery, and day 3 corresponds to 72 hours after surgery.

**Supplementary Table 1b. Plasma IL-6 and IL-10 measurements by Severe AKI status**

|                                   | IL-6 (pg/ml) |      |         |     |        |     |         |     | IL-10 (pg/ml) |     |        |      |        |      |         |      |
|-----------------------------------|--------------|------|---------|-----|--------|-----|---------|-----|---------------|-----|--------|------|--------|------|---------|------|
|                                   | Pre-op       |      | Day 1   |     | Day 2  |     | Day 3   |     | Pre-op        |     | Day 1  |      | Day 2  |      | Day 3   |      |
|                                   | No AKI       | AKI  | No AKI  | AKI | No AKI | AKI | No AKI  | AKI | No AKI        | AKI | No AKI | AKI  | No AKI | AKI  | No AKI  | AKI  |
| <b>25<sup>th</sup> percentile</b> | 1.1          | 2.7  | 89.1    | 160 | 95     | 119 | 78.8    | 112 | 0.9           | 0.9 | 13.8   | 29.6 | 1.9    | 3.6  | 0.9     | 0.9  |
| <b>Median</b>                     | 2.9          | 5.0  | 159     | 318 | 153    | 189 | 118     | 179 | 0.9           | 0.9 | 45.5   | 61.7 | 4.5    | 9.6  | 0.9     | 7.2  |
| <b>75<sup>th</sup> percentile</b> | 6.8          | 10.7 | 277     | 791 | 247    | 379 | 182     | 479 | 0.9           | 0.9 | 111    | 149  | 9.9    | 22.2 | 2.0     | 13.3 |
| <b>*P value</b>                   | 0.003        |      | <0.0001 |     | 0.003  |     | <0.0001 |     | 0.90          |     | 0.07   |      | 0.0003 |      | <0.0001 |      |

**AKI defined as an increase in serum creatinine by >100%**

Day 1 refers to postoperative time 0-6 hours after surgery, day 2 corresponds to 48 hours after surgery, and day 3 corresponds to 72 hours after surgery.

### Supplementary Figure 1

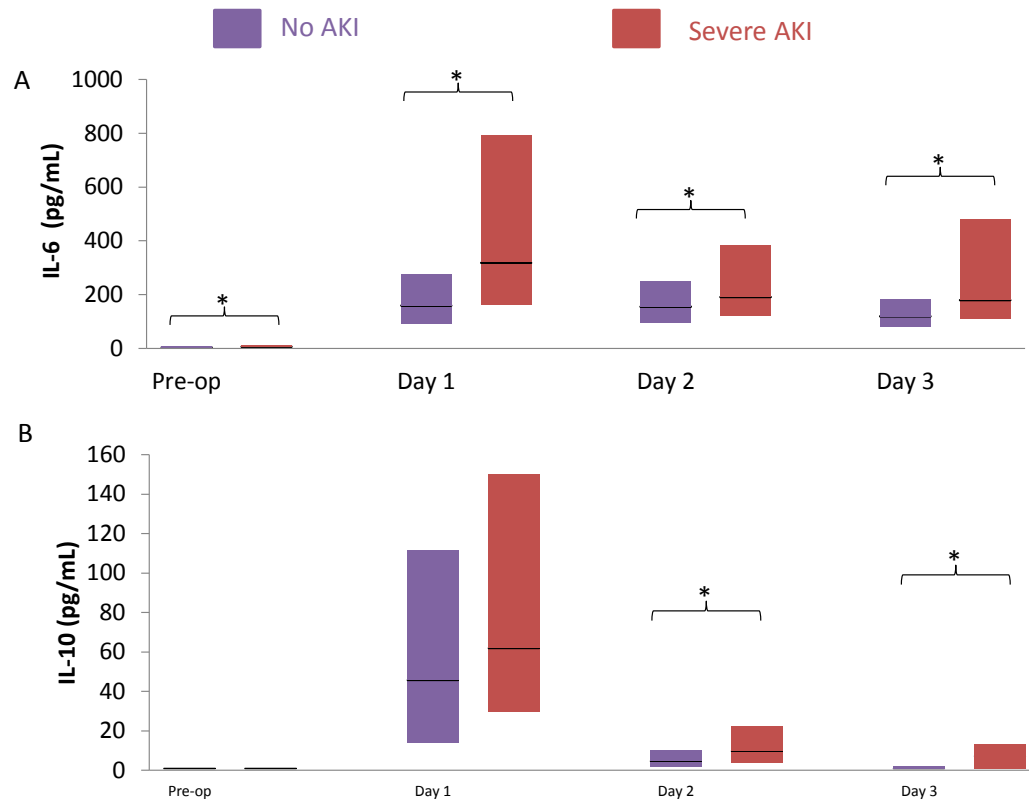

**Plasma biomarker levels by severe AKI status versus rest of the cohort.** In patients with AKI, (A) plasma IL-6 levels were significantly increased both pre- and postoperatively while (B) plasma IL-10 levels were significantly increased only on days 2 and 3. Each bar represents the interquartile range (25<sup>th</sup> percentile to 75<sup>th</sup> percentile), and the horizontal black line represents the median; \*=p<0.05. Day 1 refers to postoperative time 0-6 hours after surgery, day 2 corresponds to 48 hours after surgery, and day 3 corresponds to 72 hours after surgery.

**Supplementary Table 2. Tertiles of inflammatory biomarkers and risk of Severe AKI**

| Biomarker     | Pre-op          |                  |                                |                              | Post-op         |                 |                                |                              |
|---------------|-----------------|------------------|--------------------------------|------------------------------|-----------------|-----------------|--------------------------------|------------------------------|
|               | Tertile (Range) | Severe AKI n (%) | Unadjusted Odds Ratio (95% CI) | Adjusted Odds Ratio (95% CI) | Tertile (Range) | SevereAKI n (%) | Unadjusted Odds Ratio (95% CI) | Adjusted Odds Ratio (95% CI) |
| IL-6 (pg/mL)  | T1 (0.6-1.9)    | 8 (2.6%)         | 1.00 (referent)                | 1.00 (referent)              | T1 (6.2-111)    | 4 (1.3%)        | 1.00 (referent)                | 1.00 (referent)              |
|               | T2 (2.0-5.2)    | 8 (2.6%)         | 1.01 (0.37, 2.72)              | 1.09 (0.39, 3.08)            | T2 (111-239)    | 9 (2.8%)        | 2.28 (0.70, 7.48)              | 1.51 (0.44, 5.26)            |
|               | T3 (5.2-633)    | 17 (5.5%)        | 2.20 (0.93, 5.17)              | 2.17 (0.84, 5.63)            | T3 (241-791)    | 24 (7.5%)       | 6.41 (2.2, 18.69)              | 2.99 (0.94, 9.51)            |
| IL-10 (pg/mL) | T1 (0.9)        | 28 (3.4%)        | 1.00 (referent)                | 1.00 (referent)              | T1 (0.9-21.7)   | 8 (2.5%)        | 1.00 (referent)                | 1.00 (referent)              |
|               | T2 (1.5-168)    | 3 (3.2%)         | 0.93 (0.28, 3.10)              | 0.96 (0.26, 3.61)            | T2 (21.8-79.5)  | 16 (5%)         | 2.05 (0.86, 4.85)              | 1.47 (0.53, 4.07)            |
|               | ...             | ...              | ...                            | ...                          | T3(79.6-841)    | 13 (4.1%)       | 1.65 (0.68, 4.04)              | 1.03 (0.33, 3.18)            |

**Severe AKI defined as an increase in serum creatinine >100% or dialysis during hospitalization.**

Small cell counts are only presented for data collected by TRIBE-AKI and not from ICES data holdings. OR=odds ratio, CI=confidence interval.

**Pre-op Models:** Adjusted for age, sex, white race, non-elective surgery, pre-op eGFR, diabetes, hypertension, center, congestive heart failure, myocardial infarction, pre-op urine albumin to creatinine ratio, and type of surgery. Number of patients per tertile: IL-6 T1 n=309, T2 n=307 T3 n=308; IL-10 T1 n=814, T2 n=94.

**Post-op Models:** Adjusted for age, sex, white race, non-elective surgery, pre-op eGFR, diabetes, hypertension, center, congestive heart failure, myocardial infarction, pre-op urine albumin to creatinine ratio, and type of surgery. Number of patients per tertile: IL-6 T1 n=318, T2 n=319 T3 n=318; IL-10 T1 n=318, T2 n=319, T3 n=318.

**Supplementary Table 3. Interaction between IL-10 and IL-6 with mortality**

|       |      | First Post-operative |                      |                 |                      |
|-------|------|----------------------|----------------------|-----------------|----------------------|
|       |      | IL-6                 |                      |                 |                      |
|       |      | Low                  |                      | High            |                      |
|       |      | Mortality rate*      | Adjusted HR (95% CI) | Mortality rate* | Adjusted HR (95% CI) |
| IL-10 | Low  | 37.29                | 1.00 (referent)      | 70.56           | 1.52 (0.90, 2.57)    |
|       | High | 39.30                | 1.10 (0.82, 1.47)    | 57.45           | 1.18 (0.48, 2.92)    |

**P for interaction = 0.25**

|       |      | Peak            |                      |                 |                      |
|-------|------|-----------------|----------------------|-----------------|----------------------|
|       |      | IL-6            |                      |                 |                      |
|       |      | Low             |                      | High            |                      |
|       |      | Mortality rate* | Adjusted HR (95% CI) | Mortality rate* | Adjusted HR (95% CI) |
| IL-10 | Low  | 43.59           | 1.00 (referent)      | 60.26           | 1.13 (0.68, 1.89)    |
|       | High | 39.35           | 0.92 (0.62, 1.36)    | 59.55           | 1.03 (0.56, 1.88)    |

**P for interaction=0.87**

\*Mortality rate per 1000 patient years adjusted for site.

Adjusted for age (per year), sex, white race, CPB time > 120 minutes, non-elective surgery, pre-op eGFR, diabetes, hypertension, site, congestive heart failure, myocardial infarction, pre-op UACR, delta serum creatinine, and type of surgery.

Low biomarkers measurements are ≤median value and High biomarker measurements are < median value.

**Supplementary Table 4. First postoperative biomarkers by high and low NGAL**

|                                  |           | High NGAL (defined as > median) |                                      |                        |                      | Low NGAL (defined as <= median) |                                      |                        |                      | P-value* |
|----------------------------------|-----------|---------------------------------|--------------------------------------|------------------------|----------------------|---------------------------------|--------------------------------------|------------------------|----------------------|----------|
| Biomarker                        | Tertile   | n                               | Mortality Rate per 1000 person years | HR (95% CI) unadjusted | HR (95% CI) adjusted | n                               | Mortality Rate per 1000 person years | HR (95% CI) unadjusted | HR (95% CI) adjusted |          |
| <b>Plasma NGAL</b>               |           |                                 |                                      |                        |                      |                                 |                                      |                        |                      |          |
| <b>IL-6 Day 1<br/>0-6 Hours</b>  | <b>T1</b> | 110                             | 52.74                                | 1.00 (referent)        |                      | 208                             | 33.2                                 | 1.00 (referent)        |                      |          |
|                                  | <b>T2</b> | 154                             | 51.58                                | 0.98 (0.65, 1.46)      | 0.89 (0.58, 1.36)    | 165                             | 36.4                                 | 1.04 (0.77, 1.41)      | 1.05 (0.61, 1.80)    | 0.61     |
|                                  | <b>T3</b> | 211                             | 74.88                                | 1.42 (1.04, 1.95)      | 1.28 (0.98, 1.67)    | 107                             | 74.1                                 | 2.24 (0.60, 8.40)      | 1.68 (0.44, 6.44)    | 0.46     |
| <b>IL-10 Day 1<br/>0-6 Hours</b> | <b>T1</b> | 119                             | 63.28                                | 1.00 (referent)        |                      | 199                             | 31.3                                 | 1.00 (referent)        |                      |          |
|                                  | <b>T2</b> | 164                             | 67.56                                | 1.08 (0.69, 1.68)      | 0.89 (0.65, 1.23)    | 155                             | 42.9                                 | 1.33 (0.73, 2.44)      | 1.03 (0.56, 1.89)    | 0.98     |
|                                  | <b>T3</b> | 192                             | 27.03                                | 0.43 (0.31, 0.62)      | 0.39 (0.27, 0.57)    | 126                             | 54.1                                 | 1.71 (1.15, 2.53)      | 1.35 (0.90, 2.04)    | 0.01     |
| <b>Urine NGAL</b>                |           |                                 |                                      |                        |                      |                                 |                                      |                        |                      |          |
| <b>IL-6 Day 1<br/>0-6 Hours</b>  | <b>T1</b> | 108                             | 47.4                                 | 1.00 (referent)        |                      | 210                             | 36.5                                 | 1.00 (referent)        |                      |          |
|                                  | <b>T2</b> | 160                             | 39.27                                | 0.83 (0.74, 0.94)      | 0.71 (0.56, 0.90)    | 159                             | 49.4                                 | 1.37 (1.01, 1.87)      | 1.37 (1.04, 1.79)    | 0.01     |
|                                  | <b>T3</b> | 207                             | 71.98                                | 1.55 (0.86, 2.80)      | 1.14 (0.72, 1.81)    | 111                             | 74.1                                 | 2.03 (0.87, 4.71)      | 1.82 (0.72, 4.62)    | 0.36     |
| <b>IL-10 Day 1<br/>0-6 Hours</b> | <b>T1</b> | 122                             | 59.84                                | 1.00 (referent)        |                      | 196                             | 36.5                                 | 1.00 (referent)        |                      |          |
|                                  | <b>T2</b> | 167                             | 52.71                                | 0.91 (0.58, 1.42)      | 0.92 (0.55, 1.51)    | 152                             | 59.9                                 | 1.63 (0.98, 2.72)      | 1.24 (0.71, 2.17)    | 0.44     |
|                                  | <b>T3</b> | 186                             | 31.45                                | 0.53 (0.44, 0.65)      | 0.51 (0.36, 0.73)    | 132                             | 48.6                                 | 1.34 (1.01, 1.76)      | 1.07 (0.88, 1.30)    | 0.01     |

Adjusted for age, sex, white race, CPB time > 120 minutes, non-elective surgery, pre-op eGFR, diabetes, hypertension, center, congestive heart failure, myocardial infarction, pre-op urine albumin to creatinine ratio, and type of surgery. Mortality rates per 1000 person years were site adjusted. \* P value for interaction between tertiles of biomarker and NGAL (high/low). OR=odds ratio, CI=confidence interval, HR=hazards ratio.
